# Supplementary material for: Exceptional discovery of a shallow-water hydrothermal site in the SW area of Basiluzzo islet (Aeolian archipelago, South Tyrrhenian Sea): An environment to preserve
Source: PLoS One. 2018 Jan 4;13(1):e0190710. doi: 10.1371/journal.pone.0190710 (PMC5754086; doi:10.1371/journal.pone.0190710)
Supplement: S1 Dataset — (XLSX) [file pone.0190710.s001.xlsx]

## Sheet: Phisical-chemical parameters
Phisical-chemical parameters measured in the benthic chambers during the four deployments
Benthic chamber hight=27cm
BC1										BC2										BC3										BC4
Measurement Date	Measurement Time	Measurement Time from the beginning of the experiment	Temperature	pH	[H+]	pH	Salinity	Oxigen		Measurement Date	Measurement Time	Measurement Time from the beginning of the experiment	Temperature	pH	[H+]	pH	Salinity	Oxigen		Measurement Date	Measurement Time	Measurement Time from the beginning of the experiment	Temperature	pH	[H+]	pH	Salinity	Oxigen		Measurement Date	Measurement Time	Measurement Time from the beginning of the experiment	Temperature	pH	[H+]	pH	Salinity	Oxigen
DDMMYY	HHMMSS	days	°C	Units	mol/sqm	Units/sqm	ppt	mg/l		DDMMYY	HHMMSS	days	°C	Units	mol/sqm	Units/sqm	ppt	mg/l		DDMMYY	HHMMSS	days	°C	Units	mol/sqm	Units/sqm	ppt	mg/l		DDMMYY	HHMMSS	days	°C	Units	mol/sqm	Units/sqm	ppt	mg/l
2015-06-29	11:40:00	0	14.75	8.46	9.36189e-07	2.2842	37.56	7.95		2015-06-10	08:25:00	0	14.67	7.64	6.18534e-06	2.0628	37.68	7.72		2014-05-06	22:00:00	0.0173611	14.84	7.8	4.27921e-06	2.106	37.47	7.6		2015-06-28	11:00:00	0	14.66	8.2	1.70358e-06	2.214	37.65	7.51
2015-06-29	11:45:00	0.00347222	14.79	8.46	9.36189e-07	2.2842	37.55	7.96		2015-06-10	08:30:00	0.00347222	14.68	7.67	5.7725e-06	2.0709	37.67	7.72		2014-05-06	22:05:00	0.0208333	14.85	7.76	4.69206e-06	2.0952	37.47	7.56		2015-06-28	11:05:00	0.00347222	14.66	8.26	1.48376e-06	2.2302	37.65	7.51
2015-06-29	11:50:00	0.00694444	14.81	8.47	9.14879e-07	2.2869	37.55	7.96		2015-06-10	08:35:00	0.00694444	14.69	7.69	5.51269e-06	2.0763	37.68	7.73		2014-05-06	22:10:00	0.0243056	14.85	7.72	5.14474e-06	2.0844	37.48	7.56		2015-06-28	11:10:00	0.00694444	14.66	8.31	1.3224e-06	2.2437	37.65	7.51
2015-06-29	11:55:00	0.0104167	14.83	8.48	8.94054e-07	2.2896	37.55	7.97		2015-06-10	08:40:00	0.0104167	14.7	7.71	5.26458e-06	2.0817	37.66	7.71		2014-05-06	22:15:00	0.0277778	14.85	7.66	5.90696e-06	2.0682	37.47	7.57		2015-06-28	11:15:00	0.0104167	14.66	8.36	1.17859e-06	2.2572	37.65	7.52
2015-06-29	12:00:00	0.0138889	14.84	8.48	8.94054e-07	2.2896	37.55	7.95		2015-06-10	08:45:00	0.0138889	14.7	7.74	4.91319e-06	2.0898	37.68	7.72		2014-05-06	22:20:00	0.03125	14.86	7.59	6.94007e-06	2.0493	37.47	7.54		2015-06-28	11:20:00	0.0138889	14.66	8.4	1.07489e-06	2.268	37.65	7.5
2015-06-29	12:05:00	0.0173611	14.85	8.48	8.94054e-07	2.2896	37.55	7.94		2015-06-10	08:50:00	0.0173611	14.7	7.75	4.80135e-06	2.0925	37.66	7.72		2014-05-06	22:25:00	0.0347222	14.87	7.52	8.15387e-06	2.0304	37.47	7.55		2015-06-28	11:25:00	0.0173611	14.66	8.42	1.02651e-06	2.2734	37.6	7.52
2015-06-29	12:10:00	0.0208333	14.86	8.49	8.73703e-07	2.2923	37.54	7.95		2015-06-10	08:55:00	0.0208333	14.7	7.77	4.58526e-06	2.0979	37.66	7.73		2014-05-06	22:30:00	0.0381944	14.87	7.43	1.00315e-05	2.0061	37.47	7.51		2015-06-28	11:30:00	0.0208333	14.67	8.45	9.57996e-07	2.2815	37.59	7.51
2015-06-29	12:15:00	0.0243056	14.86	8.49	8.73703e-07	2.2923	37.54	7.93		2015-06-10	09:00:00	0.0243056	14.71	7.79	4.37889e-06	2.1033	37.65	7.73		2014-05-06	22:35:00	0.0416667	14.88	7.33	1.26288e-05	1.9791	37.47	7.51		2015-06-28	11:35:00	0.0243056	14.67	8.46	9.36189e-07	2.2842	37.6	7.5
2015-06-29	12:20:00	0.0277778	14.87	8.49	8.73703e-07	2.2923	37.54	7.94		2015-06-10	09:05:00	0.0277778	14.71	7.81	4.1818e-06	2.1087	37.66	7.74		2014-05-06	22:40:00	0.0451389	14.88	7.24	1.55369e-05	1.9548	37.47	7.5		2015-06-28	11:40:00	0.0277778	14.67	8.48	8.94054e-07	2.2896	37.6	7.51
2015-06-29	12:25:00	0.03125	14.87	8.5	8.53815e-07	2.295	37.54	7.95		2015-06-10	09:10:00	0.03125	14.71	7.83	3.99359e-06	2.1141	37.66	7.73		2014-05-06	22:45:00	0.0486111	14.89	7.14	1.95598e-05	1.9278	37.48	7.48		2015-06-28	11:45:00	0.03125	14.67	8.5	8.53815e-07	2.295	37.6	7.51
2015-06-29	12:30:00	0.0347222	14.88	8.5	8.53815e-07	2.295	37.54	7.94		2015-06-10	09:15:00	0.0347222	14.71	7.84	3.90269e-06	2.1168	37.66	7.72		2014-05-06	22:50:00	0.0520833	14.89	7.05	2.40638e-05	1.9035	37.47	7.48		2015-06-28	11:50:00	0.0347222	14.67	8.51	8.3438e-07	2.2977	37.59	7.5
2015-06-29	12:35:00	0.0381944	14.88	8.5	8.53815e-07	2.295	37.49	7.96		2015-06-10	09:20:00	0.0381944	14.71	7.86	3.72704e-06	2.1222	37.66	7.72		2014-05-06	22:55:00	0.0555556	14.9	6.97	2.8931e-05	1.8819	37.47	7.43		2015-06-28	11:55:00	0.0381944	14.67	8.52	8.15387e-07	2.3004	37.59	7.51
2015-06-29	12:40:00	0.0416667	14.88	8.51	8.3438e-07	2.2977	37.49	7.94		2015-06-10	09:25:00	0.0416667	14.7	7.88	3.55929e-06	2.1276	37.67	7.75		2014-05-06	23:00:00	0.0590278	14.9	6.9	3.3991e-05	1.863	37.48	7.42		2015-06-28	12:00:00	0.0416667	14.67	8.53	7.96826e-07	2.3031	37.59	7.49
2015-06-29	12:45:00	0.0451389	14.88	8.51	8.3438e-07	2.2977	37.48	7.95		2015-06-10	09:30:00	0.0451389	14.71	7.92	3.24611e-06	2.1384	37.66	7.72		2014-05-06	23:05:00	0.0625	14.9	6.83	3.99359e-05	1.8441	37.47	7.43		2015-06-28	12:05:00	0.0451389	14.67	8.54	7.78689e-07	2.3058	37.59	7.5
2015-06-29	12:50:00	0.0486111	14.88	8.51	8.3438e-07	2.2977	37.48	7.96		2015-06-10	09:35:00	0.0486111	14.71	7.97	2.8931e-06	2.1519	37.62	7.74		2014-05-06	23:10:00	0.0659722	14.91	6.77	4.58526e-05	1.8279	37.47	7.39		2015-06-28	12:10:00	0.0486111	14.67	8.54	7.78689e-07	2.3058	37.58	7.51
2015-06-29	12:55:00	0.0520833	14.88	8.51	8.3438e-07	2.2977	37.48	7.96		2015-06-10	09:40:00	0.0520833	14.7	8	2.7e-06	2.16	37.61	7.75		2014-05-06	23:15:00	0.0694444	14.91	6.72	5.14474e-05	1.8144	37.47	7.37		2015-06-28	12:15:00	0.0520833	14.67	8.55	7.60963e-07	2.3085	37.59	7.5
2015-06-29	13:00:00	0.0555556	14.88	8.52	8.15387e-07	2.3004	37.48	7.96		2015-06-10	09:45:00	0.0555556	14.71	8.02	2.57848e-06	2.1654	37.61	7.74		2014-05-06	23:20:00	0.0729167	14.92	6.67	5.7725e-05	1.8009	37.47	7.37		2015-06-28	12:20:00	0.0555556	14.67	8.56	7.43642e-07	2.3112	37.6	7.48
2015-06-29	13:05:00	0.0590278	14.88	8.52	8.15387e-07	2.3004	37.48	7.99		2015-06-10	09:50:00	0.0590278	14.71	8.04	2.46243e-06	2.1708	37.61	7.73		2014-05-06	23:25:00	0.0763889	14.92	6.63	6.32942e-05	1.7901	37.47	7.33		2015-06-28	12:25:00	0.0590278	14.66	8.56	7.43642e-07	2.3112	37.59	7.52
2015-06-29	13:10:00	0.0625	14.88	8.52	8.15387e-07	2.3004	37.48	7.96		2015-06-10	09:55:00	0.0625	14.71	8.06	2.3516e-06	2.1762	37.62	7.76		2014-05-06	23:30:00	0.0798611	14.93	6.58	7.10172e-05	1.7766	37.47	7.32		2015-06-28	12:30:00	0.0625	14.66	8.57	7.26714e-07	2.3139	37.59	7.5
2015-06-29	13:15:00	0.0659722	14.88	8.53	7.96826e-07	2.3031	37.48	7.97		2015-06-10	10:00:00	0.0659722	14.71	8.07	2.29807e-06	2.1789	37.61	7.72		2014-05-06	23:35:00	0.0833333	14.93	6.54	7.78689e-05	1.7658	37.47	7.33		2015-06-28	12:35:00	0.0659722	14.67	8.57	7.26714e-07	2.3139	37.59	7.47
2015-06-29	13:20:00	0.0694444	14.88	8.53	7.96826e-07	2.3031	37.47	7.95		2015-06-10	10:05:00	0.0694444	14.7	8.08	2.24576e-06	2.1816	37.62	7.72		2014-05-06	23:40:00	0.0868056	14.94	6.5	8.53815e-05	1.755	37.46	7.31		2015-06-28	12:40:00	0.0694444	14.67	8.58	7.10172e-07	2.3166	37.58	7.49
2015-06-29	13:25:00	0.0729167	14.88	8.53	7.96826e-07	2.3031	37.47	7.94		2015-06-10	10:10:00	0.0729167	14.71	8.09	2.19464e-06	2.1843	37.62	7.73		2014-05-06	23:45:00	0.0902778	14.94	6.47	9.14879e-05	1.7469	37.46	7.29		2015-06-28	12:45:00	0.0729167	14.66	8.59	6.94007e-07	2.3193	37.59	7.48
2015-06-29	13:30:00	0.0763889	14.88	8.53	7.96826e-07	2.3031	37.48	7.96		2015-06-10	10:15:00	0.0763889	14.7	8.1	2.14469e-06	2.187	37.62	7.75		2014-05-06	23:50:00	0.09375	14.95	6.44	9.80311e-05	1.7388	37.41	7.26		2015-06-28	12:50:00	0.0763889	14.67	8.59	6.94007e-07	2.3193	37.59	7.47
2015-06-29	13:35:00	0.0798611	14.88	8.54	7.78689e-07	2.3058	37.48	7.94		2015-06-10	10:20:00	0.0798611	14.7	8.11	2.09587e-06	2.1897	37.62	7.73		2014-05-06	23:55:00	0.0972222	14.95	6.41	0.000105042	1.7307	37.41	7.25		2015-06-28	12:55:00	0.0798611	14.66	8.6	6.78209e-07	2.322	37.59	7.46
2015-06-29	13:40:00	0.0833333	14.88	8.54	7.78689e-07	2.3058	37.49	7.94		2015-06-10	10:25:00	0.0833333	14.71	8.11	2.09587e-06	2.1897	37.61	7.73		2014-05-07	00:00:00	0.100694	14.96	6.38	0.000112555	1.7226	37.41	7.25		2015-06-28	13:00:00	0.0833333	14.67	8.61	6.62771e-07	2.3247	37.59	7.47
2015-06-29	13:45:00	0.0868056	14.88	8.54	7.78689e-07	2.3058	37.48	7.98		2015-06-10	10:30:00	0.0868056	14.7	8.12	2.04816e-06	2.1924	37.61	7.74		2014-05-07	00:05:00	0.104167	14.96	6.35	0.000120605	1.7145	37.42	7.24		2015-06-28	13:05:00	0.0868056	14.66	8.61	6.62771e-07	2.3247	37.58	7.47
2015-06-29	13:50:00	0.0902778	14.88	8.54	7.78689e-07	2.3058	37.48	7.94		2015-06-10	10:35:00	0.0902778	14.7	8.12	2.04816e-06	2.1924	37.61	7.71		2014-05-07	00:10:00	0.107639	14.97	6.33	0.000126288	1.7091	37.41	7.22		2015-06-28	13:10:00	0.0902778	14.66	8.62	6.47685e-07	2.3274	37.59	7.47
2015-06-29	13:55:00	0.09375	14.87	8.54	7.78689e-07	2.3058	37.48	7.95		2015-06-10	10:40:00	0.09375	14.7	8.13	2.00154e-06	2.1951	37.62	7.74		2014-05-07	00:15:00	0.111111	14.97	6.3	0.000135321	1.701	37.4	7.19		2015-06-28	13:15:00	0.09375	14.66	8.62	6.47685e-07	2.3274	37.59	7.48
2015-06-29	14:00:00	0.0972222	14.87	8.55	7.60963e-07	2.3085	37.48	7.94		2015-06-10	10:45:00	0.0972222	14.7	8.13	2.00154e-06	2.1951	37.6	7.74		2014-05-07	00:20:00	0.114583	14.98	6.28	0.000141698	1.6956	37.41	7.17		2015-06-28	13:20:00	0.0972222	14.66	8.62	6.47685e-07	2.3274	37.58	7.44
2015-06-29	14:05:00	0.100694	14.87	8.55	7.60963e-07	2.3085	37.47	7.97		2015-06-10	10:50:00	0.100694	14.7	8.13	2.00154e-06	2.1951	37.62	7.73		2014-05-07	00:25:00	0.118056	14.98	6.25	0.000151832	1.6875	37.4	7.2		2015-06-28	13:25:00	0.100694	14.66	8.62	6.47685e-07	2.3274	37.59	7.47
2015-06-29	14:10:00	0.104167	14.87	8.55	7.60963e-07	2.3085	37.48	7.98		2015-06-10	10:55:00	0.104167	14.7	8.14	1.95598e-06	2.1978	37.61	7.73		2014-05-07	00:30:00	0.121528	14.99	6.23	0.000158988	1.6821	37.41	7.15		2015-06-28	13:30:00	0.104167	14.66	8.63	6.32942e-07	2.3301	37.59	7.45
2015-06-29	14:15:00	0.107639	14.87	8.55	7.60963e-07	2.3085	37.48	7.97		2015-06-10	11:00:00	0.107639	14.7	8.14	1.95598e-06	2.1978	37.61	7.74		2014-05-07	00:35:00	0.125	14.99	6.21	0.000166481	1.6767	37.41	7.17		2015-06-28	13:35:00	0.107639	14.66	8.63	6.32942e-07	2.3301	37.59	7.47
2015-06-29	14:20:00	0.111111	14.87	8.55	7.60963e-07	2.3085	37.48	7.96		2015-06-10	11:05:00	0.111111	14.7	8.14	1.95598e-06	2.1978	37.61	7.74		2014-05-07	00:40:00	0.128472	14.99	6.19	0.000174327	1.6713	37.41	7.14		2015-06-28	13:40:00	0.111111	14.66	8.63	6.32942e-07	2.3301	37.59	7.48
2015-06-29	14:25:00	0.114583	14.87	8.56	7.43642e-07	2.3112	37.48	7.94		2015-06-10	11:10:00	0.114583	14.7	8.15	1.91145e-06	2.2005	37.62	7.74		2014-05-07	00:45:00	0.131944	15	6.18	0.000178387	1.6686	37.41	7.09		2015-06-28	13:45:00	0.114583	14.66	8.63	6.32942e-07	2.3301	37.6	7.46
2015-06-29	14:30:00	0.118056	14.87	8.56	7.43642e-07	2.3112	37.47	7.97		2015-06-10	11:15:00	0.118056	14.7	8.15	1.91145e-06	2.2005	37.61	7.72		2014-05-07	00:50:00	0.135417	15	6.16	0.000186794	1.6632	37.4	7.1		2015-06-28	13:50:00	0.118056	14.66	8.63	6.32942e-07	2.3301	37.6	7.47
2015-06-29	14:35:00	0.121528	14.86	8.56	7.43642e-07	2.3112	37.47	7.97		2015-06-10	11:20:00	0.121528	14.7	8.15	1.91145e-06	2.2005	37.61	7.77		2014-05-07	00:55:00	0.138889	15.01	6.14	0.000195598	1.6578	37.4	7.07		2015-06-28	13:55:00	0.121528	14.66	8.64	6.18534e-07	2.3328	37.59	7.47
2015-06-29	14:40:00	0.125	14.86	8.56	7.43642e-07	2.3112	37.47	7.97		2015-06-10	11:25:00	0.125	14.7	8.15	1.91145e-06	2.2005	37.62	7.73		2014-05-07	01:00:00	0.142361	15.01	6.13	0.000200154	1.6551	37.41	7.06		2015-06-28	14:00:00	0.125	14.66	8.64	6.18534e-07	2.3328	37.59	7.45
2015-06-29	14:45:00	0.128472	14.86	8.56	7.43642e-07	2.3112	37.48	7.97		2015-06-10	11:30:00	0.128472	14.7	8.15	1.91145e-06	2.2005	37.61	7.72		2014-05-07	01:05:00	0.145833	15.02	6.11	0.000209587	1.6497	37.41	7.09		2015-06-28	14:05:00	0.128472	14.66	8.64	6.18534e-07	2.3328	37.58	7.48
2015-06-29	14:50:00	0.131944	14.86	8.57	7.26714e-07	2.3139	37.47	7.95		2015-06-10	11:35:00	0.131944	14.7	8.16	1.86794e-06	2.2032	37.61	7.77		2014-05-07	01:10:00	0.149306	15.02	6.1	0.000214469	1.647	37.41	7.05		2015-06-28	14:10:00	0.131944	14.66	8.64	6.18534e-07	2.3328	37.59	7.48
2015-06-29	14:55:00	0.135417	14.86	8.57	7.26714e-07	2.3139	37.47	7.95		2015-06-10	11:40:00	0.135417	14.7	8.16	1.86794e-06	2.2032	37.61	7.74		2014-05-07	01:15:00	0.152778	15.02	6.08	0.000224576	1.6416	37.41	7.04		2015-06-28	14:15:00	0.135417	14.66	8.64	6.18534e-07	2.3328	37.59	7.45
2015-06-29	15:00:00	0.138889	14.86	8.57	7.26714e-07	2.3139	37.47	7.95		2015-06-10	11:45:00	0.138889	14.7	8.16	1.86794e-06	2.2032	37.61	7.75		2014-05-07	01:20:00	0.15625	15.03	6.07	0.000229807	1.6389	37.39	7.02		2015-06-28	14:20:00	0.138889	14.66	8.65	6.04455e-07	2.3355	37.58	7.45
2015-06-29	15:05:00	0.142361	14.86	8.57	7.26714e-07	2.3139	37.47	7.95		2015-06-10	11:50:00	0.142361	14.7	8.16	1.86794e-06	2.2032	37.61	7.75		2014-05-07	01:25:00	0.159722	15.03	6.05	0.000240638	1.6335	37.4	6.99		2015-06-28	14:25:00	0.142361	14.66	8.65	6.04455e-07	2.3355	37.58	7.47
2015-06-29	15:10:00	0.145833	14.85	8.57	7.26714e-07	2.3139	37.47	7.97		2015-06-10	11:55:00	0.145833	14.69	8.16	1.86794e-06	2.2032	37.61	7.72		2014-05-07	01:30:00	0.163194	15.04	6.04	0.000246243	1.6308	37.41	7		2015-06-28	14:30:00	0.145833	14.66	8.65	6.04455e-07	2.3355	37.58	7.47
2015-06-29	15:15:00	0.149306	14.85	8.57	7.26714e-07	2.3139	37.48	7.95		2015-06-10	12:00:00	0.149306	14.7	8.16	1.86794e-06	2.2032	37.6	7.74		2014-05-07	01:35:00	0.166667	15.04	6.02	0.000257848	1.6254	37.4	6.98		2015-06-28	14:35:00	0.149306	14.66	8.65	6.04455e-07	2.3355	37.59	7.46
2015-06-29	15:20:00	0.152778	14.85	8.57	7.26714e-07	2.3139	37.46	7.93		2015-06-10	12:05:00	0.152778	14.7	8.17	1.82542e-06	2.2059	37.61	7.76		2014-05-07	01:40:00	0.170139	15.04	6.01	0.000263854	1.6227	37.4	6.97		2015-06-28	14:40:00	0.152778	14.66	8.65	6.04455e-07	2.3355	37.58	7.48
2015-06-29	15:25:00	0.15625	14.85	8.58	7.10172e-07	2.3166	37.47	7.95		2015-06-10	12:10:00	0.15625	14.7	8.17	1.82542e-06	2.2059	37.61	7.76		2014-05-07	01:45:00	0.173611	15.05	6	0.00027	1.62	37.4	6.97		2015-06-28	14:45:00	0.15625	14.66	8.66	5.90696e-07	2.3382	37.58	7.44
2015-06-29	15:30:00	0.159722	14.85	8.58	7.10172e-07	2.3166	37.47	7.94		2015-06-10	12:15:00	0.159722	14.69	8.17	1.82542e-06	2.2059	37.61	7.73		2014-05-07	01:50:00	0.177083	15.06	5.99	0.000276289	1.6173	37.41	6.94		2015-06-28	14:50:00	0.159722	14.66	8.66	5.90696e-07	2.3382	37.58	7.47
2015-06-29	15:35:00	0.163194	14.85	8.58	7.10172e-07	2.3166	37.47	7.95		2015-06-10	12:20:00	0.163194	14.69	8.17	1.82542e-06	2.2059	37.61	7.73		2014-05-07	01:55:00	0.180556	15.06	5.97	0.00028931	1.6119	37.41	6.92		2015-06-28	14:55:00	0.163194	14.66	8.66	5.90696e-07	2.3382	37.58	7.44
2015-06-29	15:40:00	0.166667	14.85	8.58	7.10172e-07	2.3166	37.47	7.93		2015-06-10	12:25:00	0.166667	14.69	8.17	1.82542e-06	2.2059	37.61	7.75		2014-05-07	02:00:00	0.184028	15.06	5.96	0.000296049	1.6092	37.4	6.94		2015-06-28	15:00:00	0.166667	14.66	8.66	5.90696e-07	2.3382	37.58	7.45
2015-06-29	15:45:00	0.170139	14.85	8.58	7.10172e-07	2.3166	37.47	7.95		2015-06-10	12:30:00	0.170139	14.69	8.17	1.82542e-06	2.2059	37.61	7.78		2014-05-07	02:05:00	0.1875	15.07	5.95	0.000302945	1.6065	37.4	6.91		2015-06-28	15:05:00	0.170139	14.66	8.66	5.90696e-07	2.3382	37.58	7.47
2015-06-29	15:50:00	0.173611	14.84	8.59	6.94007e-07	2.3193	37.47	7.97		2015-06-10	12:35:00	0.173611	14.69	8.17	1.82542e-06	2.2059	37.61	7.78		2014-05-07	02:10:00	0.190972	15.07	5.94	0.000310001	1.6038	37.4	6.9		2015-06-28	15:10:00	0.173611	14.66	8.66	5.90696e-07	2.3382	37.58	7.49
2015-06-29	15:55:00	0.177083	14.85	8.59	6.94007e-07	2.3193	37.47	7.96		2015-06-10	12:40:00	0.177083	14.69	8.17	1.82542e-06	2.2059	37.61	7.74		2014-05-07	02:15:00	0.194444	15.07	5.93	0.000317222	1.6011	37.4	6.9		2015-06-28	15:15:00	0.177083	14.65	8.66	5.90696e-07	2.3382	37.58	7.44
2015-06-29	16:00:00	0.180556	14.85	8.59	6.94007e-07	2.3193	37.46	7.94		2015-06-10	12:45:00	0.180556	14.69	8.18	1.78387e-06	2.2086	37.61	7.73		2014-05-07	02:20:00	0.197917	15.08	5.92	0.000324611	1.5984	37.4	6.87		2015-06-28	15:20:00	0.180556	14.66	8.66	5.90696e-07	2.3382	37.58	7.45
2015-06-29	16:05:00	0.184028	14.84	8.59	6.94007e-07	2.3193	37.47	7.94		2015-06-10	12:50:00	0.184028	14.69	8.18	1.78387e-06	2.2086	37.61	7.74		2014-05-07	02:25:00	0.201389	15.08	5.91	0.000332173	1.5957	37.4	6.84		2015-06-28	15:25:00	0.184028	14.66	8.66	5.90696e-07	2.3382	37.58	7.43
2015-06-29	16:10:00	0.1875	14.84	8.59	6.94007e-07	2.3193	37.48	7.95		2015-06-10	12:55:00	0.1875	14.69	8.18	1.78387e-06	2.2086	37.61	7.77		2014-05-07	02:30:00	0.204861	15.08	5.9	0.00033991	1.593	37.41	6.83		2015-06-28	15:30:00	0.1875	14.65	8.66	5.90696e-07	2.3382	37.58	7.44
2015-06-29	16:15:00	0.190972	14.84	8.59	6.94007e-07	2.3193	37.46	7.96		2015-06-10	13:00:00	0.190972	14.69	8.18	1.78387e-06	2.2086	37.6	7.74		2014-05-07	02:35:00	0.208333	15.09	5.9	0.00033991	1.593	37.4	6.84		2015-06-28	15:35:00	0.190972	14.66	8.66	5.90696e-07	2.3382	37.59	7.46
2015-06-29	16:20:00	0.194444	14.84	8.59	6.94007e-07	2.3193	37.47	7.94		2015-06-10	13:05:00	0.194444	14.69	8.18	1.78387e-06	2.2086	37.6	7.77		2014-05-07	02:40:00	0.211806	15.09	5.89	0.000347827	1.5903	37.4	6.82		2015-06-28	15:40:00	0.194444	14.66	8.66	5.90696e-07	2.3382	37.57	7.44
2015-06-29	16:25:00	0.197917	14.84	8.59	6.94007e-07	2.3193	37.47	7.92		2015-06-10	13:10:00	0.197917	14.69	8.18	1.78387e-06	2.2086	37.61	7.75		2014-05-07	02:45:00	0.215278	15.09	5.88	0.000355929	1.5876	37.4	6.8		2015-06-28	15:45:00	0.197917	14.66	8.66	5.90696e-07	2.3382	37.58	7.41
2015-06-29	16:30:00	0.201389	14.84	8.6	6.78209e-07	2.322	37.46	7.95		2015-06-10	13:15:00	0.201389	14.69	8.18	1.78387e-06	2.2086	37.61	7.74		2014-05-07	02:50:00	0.21875	15.1	5.87	0.00036422	1.5849	37.39	6.8		2015-06-28	15:50:00	0.201389	14.66	8.66	5.90696e-07	2.3382	37.57	7.44
2015-06-29	16:35:00	0.204861	14.84	8.6	6.78209e-07	2.322	37.47	7.92		2015-06-10	13:20:00	0.204861	14.69	8.18	1.78387e-06	2.2086	37.6	7.74		2014-05-07	02:55:00	0.222222	15.1	5.86	0.000372704	1.5822	37.39	6.8		2015-06-28	15:55:00	0.204861	14.66	8.66	5.90696e-07	2.3382	37.58	7.44
										2015-06-10	13:25:00	0.208333	14.69	8.18	1.78387e-06	2.2086	37.6	7.78		2014-05-07	03:00:00	0.225694	15.11	5.85	0.000381385	1.5795	37.4	6.78		2015-06-28	16:00:00	0.208333	14.66	8.66	5.90696e-07	2.3382	37.57	7.43
										2015-06-10	13:30:00	0.211806	14.68	8.18	1.78387e-06	2.2086	37.62	7.77		2014-05-07	03:05:00	0.229167	15.11	5.84	0.000390269	1.5768	37.39	6.79		2015-06-28	16:05:00	0.211806	14.66	8.66	5.90696e-07	2.3382	37.58	7.44
										2015-06-10	13:35:00	0.215278	14.68	8.18	1.78387e-06	2.2086	37.62	7.76		2014-05-07	03:10:00	0.232639	15.11	5.83	0.000399359	1.5741	37.39	6.75		2015-06-28	16:10:00	0.215278	14.66	8.66	5.90696e-07	2.3382	37.58	7.44
										2015-06-10	13:40:00	0.21875	14.68	8.18	1.78387e-06	2.2086	37.61	7.75		2014-05-07	03:15:00	0.236111	15.12	5.83	0.000399359	1.5741	37.39	6.73		2015-06-28	16:15:00	0.21875	14.65	8.67	5.7725e-07	2.3409	37.58	7.46
										2015-06-10	13:45:00	0.222222	14.68	8.18	1.78387e-06	2.2086	37.61	7.75		2014-05-07	03:20:00	0.239583	15.12	5.82	0.000408662	1.5714	37.4	6.75		2015-06-28	16:20:00	0.222222	14.66	8.67	5.7725e-07	2.3409	37.58	7.43
										2015-06-10	13:50:00	0.225694	14.68	8.18	1.78387e-06	2.2086	37.61	7.76		2014-05-07	03:25:00	0.243056	15.13	5.81	0.00041818	1.5687	37.39	6.72		2015-06-28	16:25:00	0.225694	14.66	8.67	5.7725e-07	2.3409	37.57	7.43
										2015-06-10	13:55:00	0.229167	14.68	8.18	1.78387e-06	2.2086	37.61	7.76		2014-05-07	03:30:00	0.246528	15.13	5.81	0.00041818	1.5687	37.39	6.72		2015-06-28	16:30:00	0.229167	14.66	8.67	5.7725e-07	2.3409	37.58	7.44
										2015-06-10	14:00:00	0.232639	14.68	8.18	1.78387e-06	2.2086	37.62	7.76		2014-05-07	03:35:00	0.25	15.13	5.8	0.000427921	1.566	37.4	6.72
										2015-06-10	14:05:00	0.236111	14.68	8.18	1.78387e-06	2.2086	37.61	7.76		2014-05-07	03:40:00	0.253472	15.13	5.8	0.000427921	1.566	37.39	6.7
										2015-06-10	14:10:00	0.239583	14.68	8.18	1.78387e-06	2.2086	37.61	7.76		2014-05-07	03:45:00	0.256944	15.14	5.79	0.000437889	1.5633	37.4	6.69
										2015-06-10	14:15:00	0.243056	14.68	8.18	1.78387e-06	2.2086	37.62	7.8		2014-05-07	03:50:00	0.260417	15.14	5.79	0.000437889	1.5633	37.4	6.68
										2015-06-10	14:20:00	0.246528	14.68	8.18	1.78387e-06	2.2086	37.61	7.75		2014-05-07	03:55:00	0.263889	15.14	5.78	0.000448088	1.5606	37.39	6.66
										2015-06-10	14:25:00	0.25	14.68	8.19	1.74327e-06	2.2113	37.61	7.78		2014-05-07	04:00:00	0.267361	15.14	5.78	0.000448088	1.5606	37.4	6.65
										2015-06-10	14:30:00	0.253472	14.68	8.18	1.78387e-06	2.2086	37.6	7.77		2014-05-07	04:05:00	0.270833	15.15	5.77	0.000458526	1.5579	37.39	6.65
																				2014-05-07	04:10:00	0.274306	15.15	5.76	0.000469206	1.5552	37.39	6.63
																				2014-05-07	04:15:00	0.277778	15.15	5.76	0.000469206	1.5552	37.39	6.63
																				2014-05-07	04:20:00	0.28125	15.16	5.75	0.000480135	1.5525	37.39	6.62
																				2014-05-07	04:25:00	0.284722	15.16	5.75	0.000480135	1.5525	37.39	6.6
																				2014-05-07	04:30:00	0.288194	15.16	5.74	0.000491319	1.5498	37.39	6.61
																				2014-05-07	04:35:00	0.291667	15.17	5.74	0.000491319	1.5498	37.39	6.6
																				2014-05-07	04:40:00	0.295139	15.17	5.74	0.000491319	1.5498	37.39	6.59
																				2014-05-07	04:45:00	0.298611	15.17	5.73	0.000502764	1.5471	37.38	6.58
																				2014-05-07	04:50:00	0.302083	15.18	5.73	0.000502764	1.5471	37.39	6.58
																				2014-05-07	04:55:00	0.305556	15.18	5.72	0.000514474	1.5444	37.4	6.54
																				2014-05-07	05:00:00	0.309028	15.18	5.72	0.000514474	1.5444	37.39	6.56
																				2014-05-07	05:05:00	0.3125	15.19	5.71	0.000526458	1.5417	37.39	6.54
																				2014-05-07	05:10:00	0.315972	15.19	5.71	0.000526458	1.5417	37.39	6.53
																				2014-05-07	05:15:00	0.319444	15.19	5.71	0.000526458	1.5417	37.39	6.52
																				2014-05-07	05:20:00	0.322917	15.19	5.7	0.000538721	1.539	37.39	6.52
																				2014-05-07	05:25:00	0.326389	15.2	5.7	0.000538721	1.539	37.39	6.52
																				2014-05-07	05:30:00	0.329861	15.2	5.7	0.000538721	1.539	37.39	6.49
																				2014-05-07	05:35:00	0.333333	15.2	5.69	0.000551269	1.5363	37.39	6.5
																				2014-05-07	05:40:00	0.336806	15.21	5.69	0.000551269	1.5363	37.39	6.48
																				2014-05-07	05:45:00	0.340278	15.21	5.68	0.00056411	1.5336	37.39	6.47
																				2014-05-07	05:50:00	0.34375	15.21	5.68	0.00056411	1.5336	37.39	6.47
																				2014-05-07	05:55:00	0.347222	15.21	5.68	0.00056411	1.5336	37.38	6.48
																				2014-05-07	06:00:00	0.350694	15.22	5.68	0.00056411	1.5336	37.39	6.45
																				2014-05-07	06:05:00	0.354167	15.22	5.67	0.00057725	1.5309	37.39	6.45
																				2014-05-07	06:10:00	0.357639	15.22	5.67	0.00057725	1.5309	37.39	6.44
																				2014-05-07	06:15:00	0.361111	15.23	5.66	0.000590696	1.5282	37.39	6.45
																				2014-05-07	06:20:00	0.364583	15.23	5.66	0.000590696	1.5282	37.39	6.43
																				2014-05-07	06:25:00	0.368056	15.23	5.66	0.000590696	1.5282	37.38	6.41
																				2014-05-07	06:30:00	0.371528	15.24	5.65	0.000604455	1.5255	37.39	6.42
																				2014-05-07	06:35:00	0.375	15.24	5.65	0.000604455	1.5255	37.39	6.42
																				2014-05-07	06:40:00	0.378472	15.24	5.65	0.000604455	1.5255	37.38	6.39
																				2014-05-07	06:45:00	0.381944	15.24	5.64	0.000618534	1.5228	37.38	6.39
																				2014-05-07	06:50:00	0.385417	15.24	5.64	0.000618534	1.5228	37.39	6.39
																				2014-05-07	06:55:00	0.388889	15.24	5.64	0.000618534	1.5228	37.38	6.37
																				2014-05-07	07:00:00	0.392361	15.25	5.63	0.000632942	1.5201	37.38	6.41
																				2014-05-07	07:05:00	0.395833	15.25	5.63	0.000632942	1.5201	37.37	6.36
																				2014-05-07	07:10:00	0.399306	15.25	5.63	0.000632942	1.5201	37.38	6.37
																				2014-05-07	07:15:00	0.402778	15.25	5.63	0.000632942	1.5201	37.38	6.35
																				2014-05-07	07:20:00	0.40625	15.25	5.62	0.000647685	1.5174	37.39	6.34
																				2014-05-07	07:25:00	0.409722	15.25	5.62	0.000647685	1.5174	37.38	6.33
																				2014-05-07	07:30:00	0.413194	15.25	5.62	0.000647685	1.5174	37.38	6.34
																				2014-05-07	07:35:00	0.416667	15.26	5.61	0.000662771	1.5147	37.38	6.33
																				2014-05-07	07:40:00	0.420139	15.26	5.61	0.000662771	1.5147	37.38	6.31
																				2014-05-07	07:45:00	0.423611	15.26	5.61	0.000662771	1.5147	37.38	6.33
																				2014-05-07	07:50:00	0.427083	15.26	5.61	0.000662771	1.5147	37.38	6.3
																				2014-05-07	07:55:00	0.430556	15.26	5.6	0.000678209	1.512	37.38	6.3
																				2014-05-07	08:00:00	0.434028	15.26	5.6	0.000678209	1.512	37.38	6.3
																				2014-05-07	08:05:00	0.4375	15.26	5.6	0.000678209	1.512	37.38	6.28
																				2014-05-07	08:10:00	0.440972	15.27	5.6	0.000678209	1.512	37.39	6.28

## Sheet: DIC
DIC concentrations measured in the water samples collected inside the benthic chambers in each deployment
BC1					BC2					BC3					BC4
Sample	DIC	DIC	Sampling Time		Sample	DIC	DIC	Sampling Time		Sample	DIC	DIC	Sampling Time		Sample	DIC	DIC	Sampling Time
Unit	mmol/L	mol/m2	days		Unit	mmol/L	mol/m2	days		Unit	mmol/L	mol/m2	days		Unit	mmol/L	mol/m2	days
1	2.35418	635.629	0		1	2.42287	654.175	0		1	2.42213	0.653974	0		1	2.36135	637.563	0
2	2.35776	636.596	0.02		2	2.42234	654.033	0.03		2	2.88427	0.778752	0.0534722		2	2.39042	645.414	0.03
3	2.33585	630.68	0.06		3	2.37399	640.977	0.07		3	2.76159	0.745628	0.129167		3			0.07
4	2.28886	617.993	0.09		4	2.33016	629.144	0.11		4	4.92437	1.32958	0.196528		4	2.29097	618.562	0.11
5	2.29898	620.724	0.12		5	2.36598	638.815	0.15		5	5.77	1.5579	0.263889		5	2.33237	629.741	0.15
6	2.32352	627.352	0.15		6	2.3899	645.272	0.18		6	6.21044	1.67682	0.33125		6	2.35618	636.17	0.18
7	2.37104	640.18	0.18		7	2.42593	655	0.22		7	6.86432	1.85337	0.398611		7	2.38863	644.931	0.22
flux DIC (mmol/m2*d)=-19.29					flux DIC (mmol/m2*d)=-17.988					flux DIC (mmol/m2*d)=3223.8					flux DIC (mmol/m2*d)=-4.4149
Benthic chamber hight=27cm

## Sheet: trace elements
Trace element concentrations measured in the water samples collected inside the benthic chambers in each deployment
BC2									BC3
Sample	Fe	Fe	Fe	Mn	Mn	Mn	Sampling Time		Sample	Fe	Fe	Mn	Mn	Zn	Zn	Al	Al	Sampling Time
Unit	ppb	uM	mmol/m2	ppb	uM	mmol/m2	days		Unit	uM	mmol/m2	uM	mmol/m2	uM	mmol/m2	uM	mmol/m2	days
0	10.84	0.194102	0.0524075	2.29	0.0416834	0.0112545	0		1	0.359027	0.359027	0.0655612	0.0177015	0.0627513	0.0169428	0.273991	0.0739775	0
1	8.9	0.159364	0.0430283	2.235	0.0406822	0.0109842	0.03		2									0.0534722
3	12.05	0.215768	0.0582574	2.039	0.0371146	0.0100209	0.07		3									0.129167
4	10.37	0.185686	0.0501352	2.383	0.0433762	0.0117116	0.11		4	10.1412	2.73812	0.487	0.1291	0.386303	0.104302	1.1063	0.2987	0.196528
5	9.48	0.169749	0.0458324	1.961	0.0356948	0.00963759	0.15		5									0.263889
6	11.47	0.205383	0.0554533	2.083	0.0379155	0.0102372	0.18		6									0.33125
							0.22		7	25.6253	6.91883	1.13038	0.305204	0.430994	0.116368	2.45364	0.662484	0.398611
flux (mmol/m2*d)	0.0127			-0.0057					flux (mmol/m2*d)	9.4066		0.4053		0.1599		0.8005
Benthic chamber hight=27cm
